# Supplementary material for: Risk Prediction of Pancreatic Cancer in Patients With Abnormal Morphologic Findings Related to Chronic Pancreatitis: A Machine Learning Approach
Source: PubMed Central journal article supplement (PMC9718544; doi:10.1016/j.gastha.2022.06.008), 2022-06-17
Supplement: NIHMS1848644-supplement-2.pdf [file NIHMS1848644-supplement-2.pdf]

With abdominal CT/MRI examinations during 2008 and 2019  
N= 980,389 patients // 1,713,401 examinations

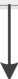

With CP feature during 2008 and 2019  
N = 63,753 patients // 100,907 examinations

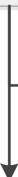

Age <18 or age >=85:  
14487 examinations  
Less than 1-year membership:  
8262 examinations

Cohort for data pull  
N = 48,563 patients // 75,018 examinations

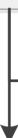

Pancreatic cancer prior to examination (dx or cancer registry)  
1754 examinations  
Less than 30-day follow-up  
2990 examinations

N = 46,041 patients // 70,274 examinations

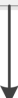

Study cohort  
Randomly select one examination for each patient  
N = 46,041 patients // 46,041 examinations
