# Supplementary material for: Risk Prediction of Pancreatic Cancer in Patients With Abnormal Morphologic Findings Related to Chronic Pancreatitis: A Machine Learning Approach
Source: PubMed Central journal article supplement (PMC9718544; doi:10.1016/j.gastha.2022.06.008), 2022-06-17

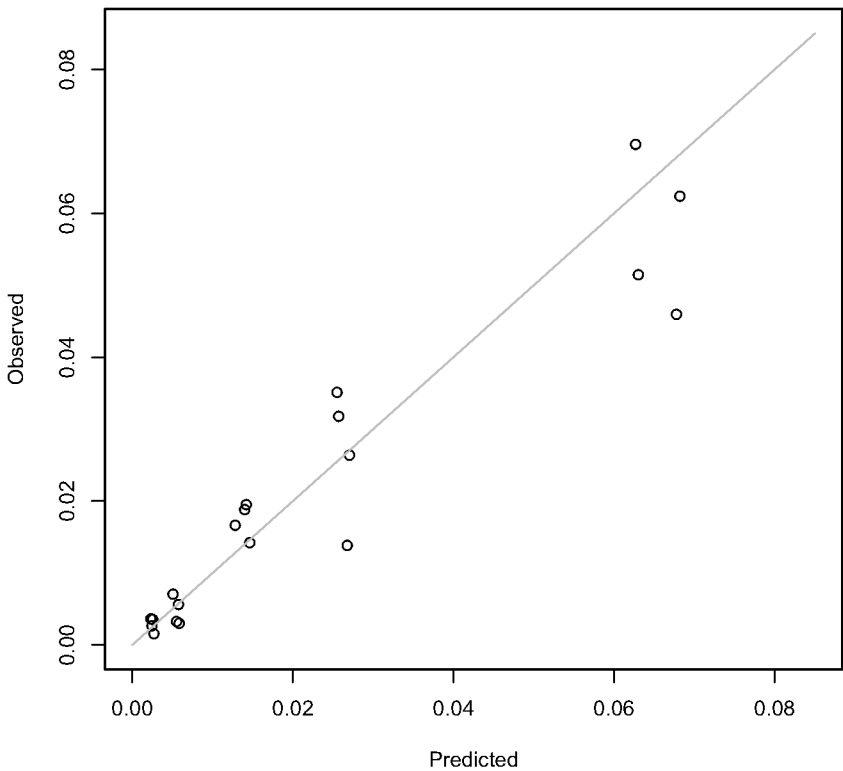

Supplement: NIHMS1848644-supplement-3.pdf [file NIHMS1848644-supplement-3.pdf]
